# Supplementary material
Source: PubMed Central journal article supplement (PMC4715482)
Supplement: NIHMS700003-supplement-Supp_MaterialS1.pdf [file NIHMS700003-supplement-Supp_MaterialS1.pdf]

Web-based Supplementary Materials for  
Exact Confidence Intervals for the Relative Risk and the Odds Ratio

**Weizhen Wang**

Department of Mathematics and Statistics, Wright State University, Dayton, OH 45435, U.S.A.

*email:* weizhen.wang@wright.edu

**and**

**Guogen Shan**

Department of Environmental and Occupational Health, University of Nevada Las Vegas,

Las Vegas, NV 89154, U.S.A.

*email:* guogen.shan@unlv.edu

This paper has been submitted for consideration for publication in *Biometrics*

## SUPPLEMENTARY MATERIALS

### 0.1 PROOFS

**Proof of Lemma 2.** Note two facts: i)  $(N_{11}, N_{21}, N_{12}) \sim \text{Multinomial}(n, p_{11}, p_{21}, p_{12})$ ; and

$$\text{ii) } P(L(N_{11}, N_{12}, N_{21}) \leq \theta_{p_r} = \frac{p_{11} + p_{12}}{p_{11} + p_{21}}) \geq 1 - \alpha, \forall (p_{11}, p_{12}, p_{21}) \in H_p.$$

Then

$$P(L(N_{11}, N_{21}, N_{12}) \leq \frac{p_{11} + p_{21}}{p_{11} + p_{12}}) \geq 1 - \alpha, \forall (p_{11}, p_{12}, p_{21}) \in H_p.$$

This implies that

$$P(\theta_{p_r} = \frac{p_{11} + p_{12}}{p_{11} + p_{21}} \leq \frac{1}{L(N_{11}, N_{21}, N_{12})}) \geq 1 - \alpha, \forall (p_{11}, p_{12}, p_{21}) \in H_p,$$

which establishes the first claim of the lemma. The second half is trivial.  $\square$

**Proof of Lemma 3.** Following Theorem 4 in Wang (2010),  $L(0, n, 0)$  is equal to the smallest solution of

$$f(\theta_{p_r}) = 1 - \sup_{(p_{11}, p_{21}) \in D(\theta_{p_r})} p_{12}^n = 1 - \alpha,$$

where  $p_{12}$  and  $D_{p_r}(\theta_{p_r})$  are given in (8) and (9), respectively. Note that  $D_{p_r}(\theta_{p_r})$ , in the  $p_{11} - p_{21}$  plane, is a triangle when  $\theta_{p_r} \geq 1$  and the intersection of two triangles when  $\theta_{p_r} < 1$ . Then the largest value of  $p_{12}$ , as a linear function of  $p_{11}$  and  $p_{21}$ , on set  $D_{p_r}(\theta_{p_r})$  occurs at  $(p_{11}, p_{21}) = (0, 1/(1 + \theta_{p_r}))$ , the top vertex of  $D_{p_r}(\theta_{p_r})$  (see Figure S1). Thus, at this point,  $p_{12} = \theta_{p_r}/(1 + \theta_{p_r})$  and

$$f(\theta_{p_r}) = 1 - \left(\frac{\theta_{p_r}}{1 + \theta_{p_r}}\right)^n.$$

The claim (17) is established by solving  $f(\theta_{p_r}) = 1 - \alpha$ .  $\square$

**Proof of Lemma 4** Note two facts: i)  $(N_{11}, N_{21}, N_{12}) \sim \text{Multinomial}(n, p_{11}, p_{21}, p_{12})$ , and

$$\text{ii) } P(L(N_{11}, N_{21}, N_{12}) \leq \frac{(p_{11} + p_{21})(p_{21} + p_{22})}{(p_{11} + p_{12})(p_{12} + p_{22})} = 1/\theta_{p_o}) \geq 1 - \alpha, \forall (p_{11}, p_{12}, p_{21}) \in H_p.$$

Then

$$P(\theta_{p_o} \leq \frac{1}{L(N_{11}, N_{21}, N_{12})}) \geq 1 - \alpha, \forall (p_{11}, p_{12}, p_{21}) \in H_p,$$

which establishes the first claim of the lemma. The second claim is trivial.  $\square$

**Proof of Lemma 5.** The first half of the lemma follows

$$P(\theta_{i_r} = \frac{p_1}{p_2} \leq U(X, Y)) = P\left(\frac{p_2}{p_1} \geq L_{n_2, n_1}(Y, X)\right) \geq 1 - \alpha, \forall (p_1, p_2) \in H_i.$$

The second half is trivial.  $\square$

## 0.2 FIGURES

[Figure 1 about here.]

[Figure 2 about here.]

[Figure 3 about here.]

[Figure 4 about here.]

*Received October 2007. Revised February 2008. Accepted March 2008.*

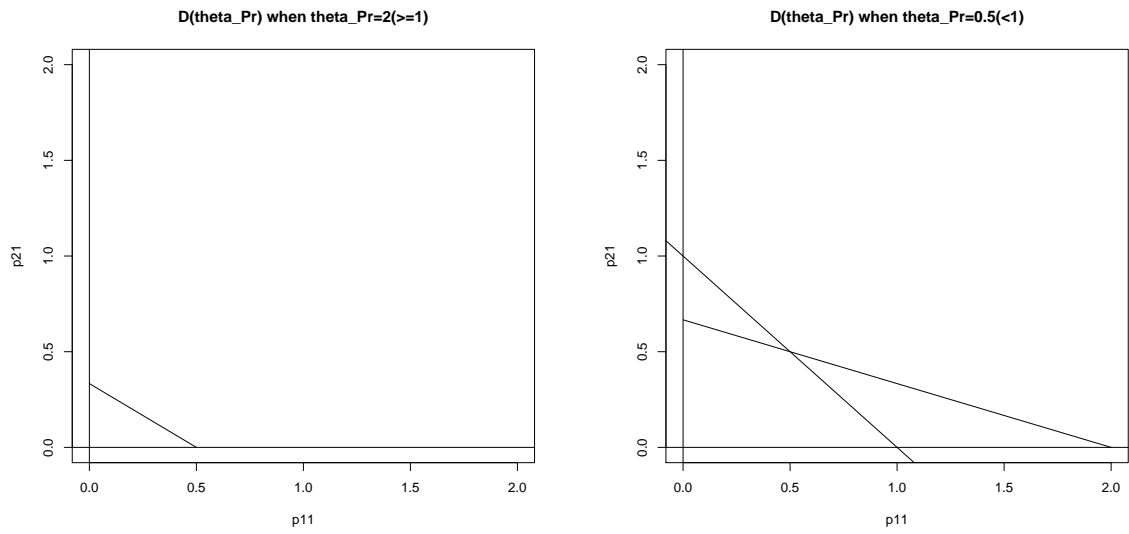

**Figure S1.** Set  $D_{p_r}(\theta_{p_r})$  is a triangle (left) when  $\theta_{p_r}(= 2) \geq 1$ , and is the intersection of two right triangles (right) when  $\theta_{p_r}(= 0.5) < 1$ .

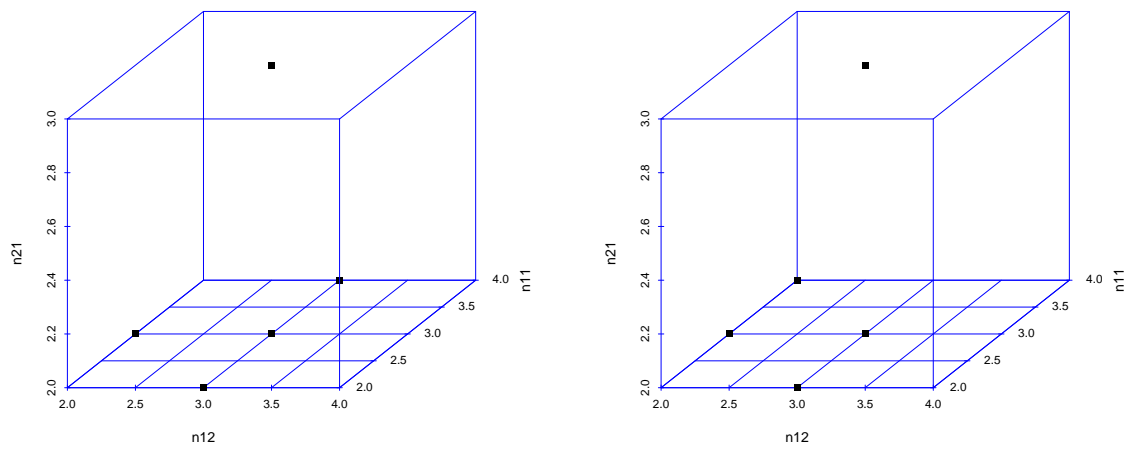

**Figure S2.** Points  $\underline{x}_p = (3, 3, 2)$ ,  $A, B, C$  and  $D$  (left). Points  $\underline{x}_p, B, C, D$  and  $E$  (right).

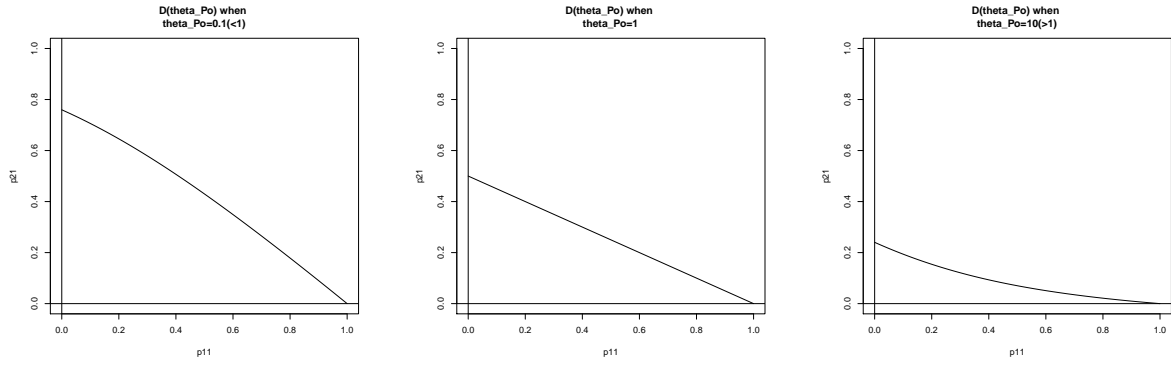

**Figure S3.** Set  $D_{p_o}(\theta_{p_o})$ , a right curved triangle with  $(p_{11}, p_{21}) = (0, 0)$  as one of its vertices for  $\theta_{p_o} = 0.1 < 1$  (left),  $= 1$  (middle),  $= 10 > 1$  (right).

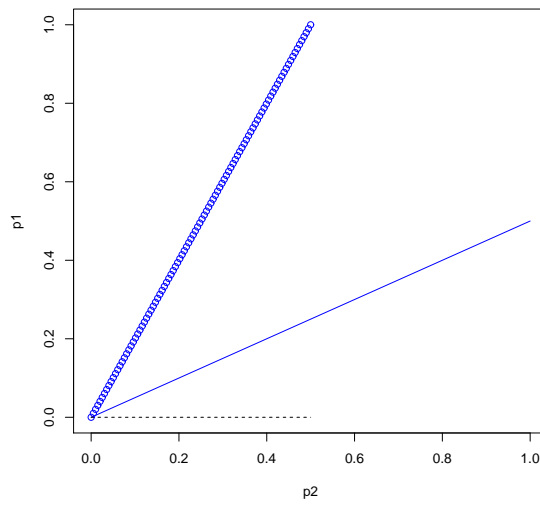

**Figure S4.** The parameter space  $H_{i_r}$  (the unit square), the sets of  $\theta_{i_r} = 0.5$  (the solid line) and  $\theta_{i_r} = 2$  (the circle line), and  $D_{i_r}(2) = [0, 0.5]$  on the  $p_2$ -axis (the dashed line). Note  $\theta_{i_r} \in [0, +\infty)$  and  $p_2 \in D_{i_r}(\theta_{i_r})$ .
